# Supplementary material for: Metagenomic Analysis of Therapeutic PYO Phage Cocktails from 1997 to 2014
Source: MDPI journal article supplement (doi:10.3390/v9110328), 2017-11-03
Supplement: s1 [file s1]

Table S2

| PYO97: Near-complete draft genome with high resemblance to reference phage and counterpart in PYO2014. (Category 1)     |                                |                             |                                                     |                           |                                                                |                                                    |                                                                                                                                 |                                                                                                                                                                                                                                                                                                                                                                                 |                                                                                                                                                                |                               |                                             |
|-------------------------------------------------------------------------------------------------------------------------|--------------------------------|-----------------------------|-----------------------------------------------------|---------------------------|----------------------------------------------------------------|----------------------------------------------------|---------------------------------------------------------------------------------------------------------------------------------|---------------------------------------------------------------------------------------------------------------------------------------------------------------------------------------------------------------------------------------------------------------------------------------------------------------------------------------------------------------------------------|----------------------------------------------------------------------------------------------------------------------------------------------------------------|-------------------------------|---------------------------------------------|
| Phage draft genome                                                                                                      | No. of contigs in draft genome | Total no. of basepairs (bp) | Closest match among 3889 reference phages from NCBI | Reference phage size (bp) | ANI (%) between phage draft genome and closest reference phage | Closest match among phage draft genomes in PYO2014 | ANI (%) between phage draft genome in PYO97 (used as db) and closest match among phage draft genomes in PYO2014 (used as query) | Comment                                                                                                                                                                                                                                                                                                                                                                         | Additional analysis                                                                                                                                            | Predicted host by HostPhinder | Reliability score linked to host prediction |
| PYO97_4                                                                                                                 | 1                              | 149,561                     | Enterococcus phage EFDG1 (NC_029009.1)              | 147,589                   | 89.77                                                          | PYO2014_27_42                                      | 90.0602                                                                                                                         |                                                                                                                                                                                                                                                                                                                                                                                 | <a href="#">BLAST ATLAS of contigs from PYO97_4 and PYO2014_27_42. 21.133.90.116.20.14.109.73 as outer rings against Enterococcus phage EFDG1 as reference</a> | Enterococcus faecalis         | 6.80E-01                                    |
| PYO97_10_85.139.47.48.59.38.5.35.15.78.55.4.4.14                                                                        | 13                             | 344,749                     | Escherichia phage PBECO 4 (NC_027364.1)             | 348,113                   | 90.848                                                         | PYO2014_31                                         | 83.8749                                                                                                                         | Escherichia phage 121Q is the best reference genome for PYO2014_31 and has 89.976% ANI towards this bin. The best common reference is Escherichia phage PBECO 4.                                                                                                                                                                                                                | <a href="#">BLAST Atlas of bin vs Escherichia phage PBECO 4</a>                                                                                                | Escherichia coli              | 7.90E-01                                    |
| PYO97_11                                                                                                                | 1                              | 72,136                      | Pseudomonas phage PEV2 (NC_031063.1)                | 72,697                    | 97.37                                                          | PYO2014_26_13                                      | 97.2065                                                                                                                         |                                                                                                                                                                                                                                                                                                                                                                                 | <a href="#">BLAST ATLAS of PYO97_11 and PYO2014_26.13 against Pseudomonas phage PEV2 as reference.</a>                                                         | Pseudomonas aeruginosa        | 7.70E-01                                    |
| PYO97_15                                                                                                                | 1                              | 44,667                      | Pseudomonas phage TL (NC_023583.1)                  | 45,696                    | 92.02                                                          | PYO2014_12                                         | 91.222                                                                                                                          |                                                                                                                                                                                                                                                                                                                                                                                 | <a href="#">BLAST ATLAS with Pseudomonas phage TL as the reference and PYO97_15 and PYO2014_12 as the outer rings</a>                                          | Pseudomonas aeruginosa        | 7.70E-01                                    |
| PYO97_16                                                                                                                | 1                              | 130,932                     | Staphylococcus phage Sb-1 (HQ163896.1)              | 127,188                   | 96.86                                                          | PYO2014_30                                         | 94.077                                                                                                                          |                                                                                                                                                                                                                                                                                                                                                                                 | <a href="#">BLAST ATLAS with Staphylococcus phage Sb-1 as the reference and PYO97_16 and PYO2014_30 as the outer rings</a>                                     | Staphylococcus aureus         | 6.70E-01                                    |
| PYO97_29                                                                                                                | 1                              | 169,029                     | Shigella phage SHFML-11 (NC_030953.1)               | 170,650                   | 89.959                                                         | PYO2014_21                                         | 89.72                                                                                                                           | The best ref is Enterobacteria phage RB14 (NC_012638.1) 165429bp; 91.74% ANI. Shigella phage SHFML-11 is the best common reference between PYO97_29 and PYO2014_21.                                                                                                                                                                                                             | <a href="#">BLAST Atlas PYO2014_21 and PYO97_29 with Shigella as reference</a>                                                                                 | Escherichia coli              | 6.00E-01                                    |
| PYO97 - Near-complete draft genome with high resemblance to reference phage, but no counterpart in PYO2014 (Category 2) |                                |                             |                                                     |                           |                                                                |                                                    |                                                                                                                                 |                                                                                                                                                                                                                                                                                                                                                                                 |                                                                                                                                                                |                               |                                             |
| Phage draft genome                                                                                                      | No. of contigs in draft genome | Total no. of basepairs (bp) | Closest match among 3889 reference phages from NCBI | Reference phage size (bp) | ANI (%) between phage draft genome and closest reference phage | Closest match among phage draft genomes in PYO2014 | ANI (%) between phage draft genome in PYO97 (used as db) and closest match among phage draft genomes in PYO2014 (used as query) | Comment                                                                                                                                                                                                                                                                                                                                                                         | Additional analysis                                                                                                                                            | Predicted host by HostPhinder | Reliability score linked to host prediction |
| PYO97_7                                                                                                                 | 7                              | 166,126                     | Klebsiella phage vB KpnM KpV477 (NC_031087.1)       | 168,272                   | 88.66                                                          | PYO2014_21                                         | 34.04                                                                                                                           |                                                                                                                                                                                                                                                                                                                                                                                 | <a href="#">BLAST Atlas of bin against Klebsiella phage vB KpnM KpV477</a>                                                                                     | Klebsiella pneumoniae         | 6.70E-01                                    |
| PYO97_8                                                                                                                 | 1                              | 38,419                      | Enterobacteria phage 285P (NC_015249.1)             | 39,270                    | 79.568                                                         | PYO2014_25                                         | 66.3891                                                                                                                         | PYO2014_25 is classified as family bin (overlapping contigs). The best matching is Erwinia phage FE44 (NC_022744.1), 81.047% ANI. Erwinia is a genus of Enterobacteriaceae (like E. coli), but mostly plant pathogenic! Enterobacteria phage 285P (NC_015249.1) is the closest shared reference between PYO97_8 and PYO2014_25 and ranks 3rd among the best matching references | <a href="#">BLAST Atlas of PYO97_8 and PYO2014_25 with Enterobacteria phage 285P as reference</a>                                                              | Escherichia coli              | 4.10E-01                                    |
| PYO97_22.3.14                                                                                                           | 3                              | 109,428                     | Salmonella phage Shivani (NC_028754.1)              | 120,098                   | 95.33                                                          | PYO2014_7                                          | 13.49                                                                                                                           |                                                                                                                                                                                                                                                                                                                                                                                 | <a href="#">BLAST Atlas of contigs against Salmonella phage Shivani</a>                                                                                        | Salmonella enterica           | 7.70E-01                                    |
| PYO97_24                                                                                                                | 1                              | 44,541                      | Proteus phage PM 85 (NC_027379.1)                   | 43,642                    | 92.726                                                         | PYO2014_11                                         | 0.533                                                                                                                           |                                                                                                                                                                                                                                                                                                                                                                                 | <a href="#">BLAST ATLAS of contigs against Proteus phage PM 85 as reference</a>                                                                                | Proteus mirabilis             | 7.00E-01                                    |

|                                                                                                                      |                                |                             |                                                     |                                                  |                                                                |                                                    |                                                                                                                                 |          |                                                                                            |                                                                                                                                                                 |                                                                                            |                                                                         |                               |                                             |  |  |
|----------------------------------------------------------------------------------------------------------------------|--------------------------------|-----------------------------|-----------------------------------------------------|--------------------------------------------------|----------------------------------------------------------------|----------------------------------------------------|---------------------------------------------------------------------------------------------------------------------------------|----------|--------------------------------------------------------------------------------------------|-----------------------------------------------------------------------------------------------------------------------------------------------------------------|--------------------------------------------------------------------------------------------|-------------------------------------------------------------------------|-------------------------------|---------------------------------------------|--|--|
| PYO97_32                                                                                                             |                                | 3                           | 47,235                                              | Salmonella phage vB SenS-Ent1 (HE775250.1)       | 42,391                                                         | 86,967                                             | PYO2014_24                                                                                                                      | 0.134606 | The fact that it's more than 10% larger than the reference is due to contigs overlapping   | <a href="#">BLAST ATLAS of contigs against Salmonella phage vB SenS-Ent1 as reference</a>                                                                       | <a href="#">BLAST Atlas of bin against Salmonella phage vB SenS-Ent1</a>                   |                                                                         | Salmonella enterica           | 4.30E-01                                    |  |  |
| PYO97 - Partial draft genome with low/medium resemblance to reference phage and counterpart in PYO2014. (Category 3) |                                |                             |                                                     |                                                  |                                                                |                                                    |                                                                                                                                 |          |                                                                                            |                                                                                                                                                                 |                                                                                            |                                                                         |                               |                                             |  |  |
| Phage draft genome                                                                                                   | No. of contigs in draft genome | Total no. of basepairs (bp) | Closest match among 3889 reference phages from NCBI | Reference phage size (bp)                        | ANI (%) between phage draft genome and closest reference phage | Closest match among phage draft genomes in PYO2014 | ANI (%) between phage draft genome in PYO97 (used as db) and closest match among phage draft genomes in PYO2014 (used as query) | Comment  | Additional analysis                                                                        |                                                                                                                                                                 |                                                                                            |                                                                         | Predicted host by HostPhinder | Reliability score linked to host prediction |  |  |
| PYO97_27.21                                                                                                          |                                | 2                           | 37,487                                              | Yersinia phage phi80-18 (NC_019911.1)            | 42,081                                                         | 22,104                                             | PYO2014_28                                                                                                                      | 88.013   |                                                                                            | <a href="#">BLAST Atlas of PYO97_21 and PYO97_27 against common reference Yersinia phage phi80-18</a>                                                           | <a href="#">Blast Atlas of PYO97_27.21 and PYO2014_28 towards Yersinia phage phi80-18</a>  | <a href="#">Blast Atlas of PYO2014_28 with PYO97_27.21 as reference</a> | Yersinia enterocolitica       | 1.80E-03                                    |  |  |
| PYO97 - Partial draft genome with no resemblance to reference phage and no counterpart in PYO2014. (Category 4)      |                                |                             |                                                     |                                                  |                                                                |                                                    |                                                                                                                                 |          |                                                                                            |                                                                                                                                                                 |                                                                                            |                                                                         |                               |                                             |  |  |
| Phage draft genome                                                                                                   | No. of contigs in draft genome | Total no. of basepairs (bp) | Closest match among 3889 reference phages from NCBI | Reference phage size (bp)                        | ANI (%) between phage draft genome and closest reference phage | Closest match among phage draft genomes in PYO2014 | ANI (%) between phage draft genome in PYO97 (used as db) and closest match among phage draft genomes in PYO2014 (used as query) | Comment  | Additional analysis                                                                        |                                                                                                                                                                 |                                                                                            |                                                                         | Predicted host by HostPhinder | Reliability score linked to host prediction |  |  |
| PYO97_1                                                                                                              |                                | 1                           | 11,445                                              | Escherichia phage vB EcoM AYO145A (NC_028825.1)  | 87,372                                                         | 10,99                                              | PYO2014_10                                                                                                                      | 0.178    |                                                                                            | <a href="#">BLAST ATLAS of contig against Escherichia phage vB EcoM AYO145A as reference</a>                                                                    |                                                                                            |                                                                         | Escherichia coli              | 4.70E-02                                    |  |  |
| PYO97_5                                                                                                              |                                | 3                           | 29,155                                              | Pseudomonas phage vB Pae-TbilisiM32 (JQ307386.1) | 42,966                                                         | 68.72                                              | PYO2014_19                                                                                                                      | 0.12     |                                                                                            | <a href="#">BLAST ATLAS of contigs against reference</a>                                                                                                        |                                                                                            |                                                                         | Pseudomonas aeruginosa        | 5.60E-01                                    |  |  |
| PYO97_9                                                                                                              |                                | 1                           | 10,727                                              | Salmonella phage BP63 (NC_031250.1)              | 52,437                                                         | 19.779                                             | PYO2014_18                                                                                                                      | 0.07     |                                                                                            | <a href="#">BLAST ATLAS of contig against Salmonella phage BP63 as reference</a>                                                                                |                                                                                            |                                                                         | No_significant_match_found    |                                             |  |  |
| PYO97_10_3.8.10.28.42                                                                                                |                                | 5                           | 343,801                                             | Escherichia phage 121Q (NC_025447.1)             | 348,532                                                        | 28.408                                             | PYO2014_31                                                                                                                      | 33.3208  |                                                                                            | <a href="#">BLAST Atlas of bin vs Escherichia phage 121Q</a>                                                                                                    | <a href="#">BLAST Atlas of bin and PYO2014_31 with Escherichia phage 121Q as reference</a> | <a href="#">BLAST Atlas of contigs vs Escherichia phage 121Q</a>        | Cronobacter sakazakii         | 7.80E-03                                    |  |  |
| PYO97_13                                                                                                             |                                | 1                           | 37,843                                              | Hamiltonella virus APSE1 (NC_000935.1)           | 38,742                                                         | 9.777                                              | PYO2014_31                                                                                                                      | 0.101339 | Low/medium similarity to reference phage sequence.                                         | <a href="#">BLAST ATLAS of contigs against reference</a>                                                                                                        |                                                                                            |                                                                         | Hamiltonella defensa          | 1.90E-03                                    |  |  |
| PYO97_17.30                                                                                                          |                                | 7                           | 90,209                                              | Salmonella phage SSE121 (NC_027351.1)            | 147,745                                                        | 58.832                                             | PYO2014_18                                                                                                                      | 3.633    |                                                                                            | <a href="#">BLAST Atlas of PYO97_30 and PYO97_17 against Salmonella phage SSE-121. Coverage of PYO97_17 from 12.757 to 21.05; coverage of PYO97_30 : 22.975</a> |                                                                                            |                                                                         | Salmonella enteritidis        | 5.40E-01                                    |  |  |
| PYO97_20                                                                                                             |                                | 1                           | 90,712                                              | Cronobacter phage vB CsaP GAP52 (NC_019402.1)    | 76,631                                                         | 19.54                                              | PYO2014_2                                                                                                                       | 5.027    | Low similarity to reference phage sequence. Low similarity to phage draft found in PYO2014 | <a href="#">BLAST ATLAS of contigs against Escherichia phage KBNP1711 as reference.</a>                                                                         | <a href="#">BLAST ATLAS of PYO97_20 as reference and PYO2014_2</a>                         |                                                                         | Cronobacter sakazakii         | 3.20E-03                                    |  |  |
| PYO97_25                                                                                                             |                                | 1                           | 25,293                                              | Proteus phage pFM_01 (NC_028812.1)               | 58,546                                                         | 41.01                                              | PYO2014_3.16.29                                                                                                                 | 68.8522  | PYO2014 --> ANI (%) 3 --> 84.378 16 --> 87.809 29 --> 48.973                               | <a href="#">BLAST ATLAS of PYO97_25 and PYO2014_16 as the outer rings and the reference as the inner ring</a>                                                   | <a href="#">BLAST ATLAS of PYO97_25 against reference genome</a>                           |                                                                         | Proteus mirabilis             | 2.80E-01                                    |  |  |
| PYO97_26                                                                                                             |                                | 5                           | 171,908                                             | Cronobacter phage S13 (NC_028773.1)              | 182,145                                                        | 45.28                                              | PYO2014_21                                                                                                                      | 7.97     | Medium resemblance to reference phage                                                      | <a href="#">BLAST ATLAS of bin against reference</a>                                                                                                            |                                                                                            |                                                                         | Cronobacter sakazakii         | 9.00E-03                                    |  |  |
| PYO97_28                                                                                                             |                                | 5                           | 30,952                                              | Salmonella phage 21 (NC_029050.1)                | 51,896                                                         | 21.43                                              | PYO2014_18                                                                                                                      | 0.83     |                                                                                            | <a href="#">BLAST ATLAS of contigs against reference</a>                                                                                                        |                                                                                            |                                                                         | Salmonella enteritidis        | 1.10E-01                                    |  |  |
| PYO97_31                                                                                                             |                                | 3                           | 69,885                                              | Salmonella phage Felix 01 (NC_005282.1)          | 86,155                                                         | 75.359                                             | PYO2014_15                                                                                                                      | 0.591    | Almost 20,000 bp shorter than ref. sequence. Maybe partial.                                | <a href="#">BLAST ATLAS of contigs against Enterobacteria phage Felix 01 as reference</a>                                                                       |                                                                                            |                                                                         | Escherichia coli              | 4.60E-01                                    |  |  |
| PYO97 - Collapsed bins. (Category 5)                                                                                 |                                |                             |                                                     |                                                  |                                                                |                                                    |                                                                                                                                 |          |                                                                                            |                                                                                                                                                                 |                                                                                            |                                                                         |                               |                                             |  |  |
| Phage draft genome                                                                                                   | No. of contigs in draft genome | Total no. of basepairs (bp) | Closest match among 3889 reference phages from NCBI | Reference phage size (bp)                        | ANI (%) between phage draft genome and closest reference phage | Closest match among phage draft genomes in PYO2014 | ANI (%) between phage draft genome in PYO97 (used as db) and closest match among phage draft genomes in PYO2014 (used as query) | Comment  | Additional analysis                                                                        |                                                                                                                                                                 |                                                                                            |                                                                         | Predicted host by HostPhinder | Reliability score linked to host prediction |  |  |

|                                                                              |                                |                             |                                                                                |                           |                                                                |                                                    |                                                                                                                                 |                                                                                                                                               |                                                                                                    |                                                                                                                                                 |                                                                                                                                    |                               |                                             |                                                          |                                                                                                  |
|------------------------------------------------------------------------------|--------------------------------|-----------------------------|--------------------------------------------------------------------------------|---------------------------|----------------------------------------------------------------|----------------------------------------------------|---------------------------------------------------------------------------------------------------------------------------------|-----------------------------------------------------------------------------------------------------------------------------------------------|----------------------------------------------------------------------------------------------------|-------------------------------------------------------------------------------------------------------------------------------------------------|------------------------------------------------------------------------------------------------------------------------------------|-------------------------------|---------------------------------------------|----------------------------------------------------------|--------------------------------------------------------------------------------------------------|
| PYO97_12                                                                     | 5                              | 55,452                      | Enterococcus phage IME-EFm5 (NC_028826.1)                                      | 42,265                    | 69,288                                                         | PYO2014_1                                          | 93,401                                                                                                                          | The k-mer coverage values of overlapping contigs vary between 1.803 and 3.871. While the non overlapping contig has a k-mer coverage of 6.636 | <a href="#">BLAST ATLAS of bin against Enterococcus phage IME-EFm5 as reference.</a>               | <a href="#">BLAST of contigs from PYO97_12 against PYO2014_1</a>                                                                                | <a href="#">PYO97_12 and PYO2014_1 look more similar to each other than each does to the reference Enterococcus phage IME-EFm5</a> | Enterococcus faecium          | 2.00E-01                                    | <a href="#">BLAST Atlas of contigs against reference</a> | <a href="#">BLAST Atlas PYO2014_1 and PYO97_12 with Enterococcus phage IME-EFm5 as reference</a> |
| PYO97_23                                                                     | 5                              | 73,434                      | Enterococcus phage VD13 (NC_024212.1)                                          | 55,726                    | 74,273                                                         | PYO2014_20                                         | 76.5524                                                                                                                         |                                                                                                                                               | <a href="#">BLAST ATLAS of contigs against Enterococcus phage VD13 as reference.</a>               | <a href="#">BLAST Atlas of bin against Enterococcus phage VD13</a>                                                                              | <a href="#">BLAST ATLAS of PYO2014_20 vs. PYO97_23</a>                                                                             | Enterococcus faecalis         | 2.70E-01                                    |                                                          |                                                                                                  |
| PYO97 - Special cases, including bins classified as non-phages. (Category 6) |                                |                             |                                                                                |                           |                                                                |                                                    |                                                                                                                                 |                                                                                                                                               |                                                                                                    |                                                                                                                                                 |                                                                                                                                    |                               |                                             |                                                          |                                                                                                  |
| Phage draft genome                                                           | No. of contigs in draft genome | Total no. of basepairs (bp) | Closest match among 3889 reference phages from NCBI                            | Reference phage size (bp) | ANI (%) between phage draft genome and closest reference phage | Closest match among phage draft genomes in PYO2014 | ANI (%) between phage draft genome in PYO97 (used as db) and closest match among phage draft genomes in PYO2014 (used as query) | Comment                                                                                                                                       | Additional analysis                                                                                |                                                                                                                                                 |                                                                                                                                    | Predicted host by HostPhinder | Reliability score linked to host prediction |                                                          |                                                                                                  |
| PYO97_2                                                                      | 1                              | 11,313                      | uncultured Mediterranean phage uvMED-GF-C25-MedDCM-OCT-S33-C258 (AP014078.1)   | 6,279                     | 0.704                                                          | PYO2014_14                                         | 0.24                                                                                                                            | Ref. phage sequence is partial                                                                                                                | Does not resemble any other known phage sequence                                                   | The bin has 0.275% ANI towards phages in public databases. Possibly it is not a phage.                                                          |                                                                                                                                    | No_significant_match_found    |                                             |                                                          |                                                                                                  |
| PYO97_6                                                                      | 8                              | 23,397                      | uncultured Mediterranean phage uvMED-CGF-C14B-MedDCM-OCT-S36-C258 (AP013800.1) | 7,156                     | 1.426                                                          | PYO2014_6                                          | 6.28648                                                                                                                         | Ref. phage sequence is partial                                                                                                                | Does not resemble any other known phage sequence                                                   | The bin has 0% ANI towards phages in public databases. Possibly it is not a phage.                                                              |                                                                                                                                    | Clostridium perfringens       | 1.00E-03                                    |                                                          |                                                                                                  |
| PYO97_18                                                                     | 1                              | 11,354                      | Pseudomonas phage PRR1 (NC_008294.1)                                           | 3,573                     | 0.984                                                          | PYO2014_10                                         | 0.403                                                                                                                           | The reference phage has ss-RNA as genome!                                                                                                     | <a href="#">BLAST ATLAS of contigs against Pseudomonas phage PRR1 as reference</a>                 | The bin has 7.625% ANI towards phages in public databases and 23.684% coverage of Shigella sonnei Ss046 chromosome. Possibly it is not a phage. |                                                                                                                                    | Escherichia coli              | 3.00E-03                                    |                                                          |                                                                                                  |
| PYO97_19                                                                     | 10                             | 284,533                     | Staphylococcus phage Sb-1 (HQ163896.1)                                         | 127,188                   | 18.88                                                          | PYO2014_30                                         | 19.03                                                                                                                           | Large size of phage draft genome suggests sequences from more phages have been wrongly binned                                                 | Separate calculating of ANI for the contigs to try and resolve if contigs have been wrongly binned | The bin has 0% ANI towards phages in public databases. Possibly it is not a phage.                                                              |                                                                                                                                    | Bacillus anthracis            | 1.50E-02                                    |                                                          |                                                                                                  |
| PYO97_33                                                                     | 3                              | 10,088                      | uncultured Mediterranean phage uvMED-CGF-C23-MedDCM-OCT-S24-C232 (AP013582.1)  | 5,75                      | 1.131                                                          | PYO2014_14                                         | 0.786                                                                                                                           | Ref. phage sequence is partial                                                                                                                | Does not resemble any other known phage sequence                                                   | The bin has 1.58794% ANI towards phages in public databases                                                                                     |                                                                                                                                    | Klebsiella pneumoniae         | 3.70E-04                                    |                                                          |                                                                                                  |
