# Supplementary material for: Metagenomic Analysis of Therapeutic PYO Phage Cocktails from 1997 to 2014
Source: MDPI journal article supplement (doi:10.3390/v9110328), 2017-11-03
Supplement: s1 [file s1]

Table S3

| PYO2014: Near-complete draft genome with high resemblance to reference phage and counterpart in PYO97. (Category 1)      |                                |                             |                                                     |                           |                                                                |                                                  |                                                                                                                                 |                                                                                                                    |                                                                                                                  |                                                                                                                            |                                                                                                                 |                                             |          |
|--------------------------------------------------------------------------------------------------------------------------|--------------------------------|-----------------------------|-----------------------------------------------------|---------------------------|----------------------------------------------------------------|--------------------------------------------------|---------------------------------------------------------------------------------------------------------------------------------|--------------------------------------------------------------------------------------------------------------------|------------------------------------------------------------------------------------------------------------------|----------------------------------------------------------------------------------------------------------------------------|-----------------------------------------------------------------------------------------------------------------|---------------------------------------------|----------|
| Phage draft genome                                                                                                       | No. of contigs in draft genome | Total no. of basepairs (bp) | Closest match among 3889 reference phages from NCBI | Reference phage size (bp) | ANI (%) between phage draft genome and closest reference phage | Closest match among phage draft genomes in PYO97 | ANI (%) between phage draft genome in PYO2014 (used as db) and closest match among phage draft genomes in PYO97 (used as query) | Comment                                                                                                            | Additional analysis                                                                                              |                                                                                                                            | Predicted host by HostPhinder                                                                                   | Reliability score linked to host prediction |          |
| PYO2014_1                                                                                                                | 1                              | 42,721                      | Enterococcus phage IME-EFm5 (NC_028826.1)           | 42,265                    | 70.16                                                          | PYO97_12                                         | 87.65                                                                                                                           | Similar phage draft genome found in PYO97, although PYO97_12 is 55,452 bp. PYO97_12 made up of overlapping contigs | <a href="#">BLASTAtlas of PYO2014_1 against Enterococcus phage</a>                                               | <a href="#">BLASTAtlas PYO2014_1 and PYO97_12 with Enterococcus phage IME-EFm5 as reference</a>                            | Enterococcus faecium                                                                                            | 1.80E-01                                    |          |
| PYO2014_12                                                                                                               | 1                              | 47,209                      | Pseudomonas phage TL (NC_023583.1)                  | 45,696                    | 97.91                                                          | PYO97_15                                         | 94.45                                                                                                                           |                                                                                                                    | <a href="#">BLASTAtlas of PYO2014_12 against Pseudomonas Phage TL</a>                                            | <a href="#">BLAST ATLAS with Pseudomonas phage TL as the reference and PYO97_15 and PYO2014_12 as the outer rings</a>      | Pseudomonas aeruginosa                                                                                          | 8.60E-01                                    |          |
| PYO2014_27_42_21.133.90.116.20.14.109.73                                                                                 | 9                              | 138,228                     | Enterococcus phage EFDG1 (NC_029009.1)              | 147,589                   | 81.548                                                         | PYO97_4                                          | 83.887                                                                                                                          |                                                                                                                    | <a href="#">BLAST ATLAS of contigs PYO2014_27_42_21.133.90.116.20.14.109.73 against Enterococcus phage EFDG1</a> | <a href="#">BLAST Atlas of bin against Enterococcus phage EFDG1 (NC_029009.1)</a>                                          | Enterococcus faecalis                                                                                           | 5.50E-01                                    |          |
| PYO2014_30                                                                                                               | 1                              | 138,269                     | Staphylococcus phage ISP (FR852584.1)               | 138,339                   | 99.36                                                          | PYO97_16                                         | 99.44                                                                                                                           |                                                                                                                    | <a href="#">BLASTAtlas of PYO2014_30 against Staphylococcus phage ISP</a>                                        | <a href="#">BLAST ATLAS with Staphylococcus phage Sb-1 as the reference and PYO97_16 and PYO2014_30 as the outer rings</a> | Staphylococcus aureus                                                                                           | 7.00E-01                                    |          |
|                                                                                                                          |                                |                             |                                                     |                           |                                                                |                                                  |                                                                                                                                 |                                                                                                                    |                                                                                                                  |                                                                                                                            |                                                                                                                 |                                             |          |
| PYO2014 - Near-complete draft genome with high resemblance to reference phage, but no counterpart in PYO97. (Category 2) |                                |                             |                                                     |                           |                                                                |                                                  |                                                                                                                                 |                                                                                                                    |                                                                                                                  |                                                                                                                            |                                                                                                                 |                                             |          |
| Phage draft genome                                                                                                       | No. of contigs in draft genome | Total no. of basepairs (bp) | Closest match among 3889 reference phages from NCBI | Reference phage size (bp) | ANI (%) between phage draft genome and closest reference phage | Closest match among phage draft genomes in PYO97 | ANI (%) between phage draft genome in PYO2014 (used as db) and closest match among phage draft genomes in PYO97 (used as query) | Comment                                                                                                            | Additional analysis                                                                                              |                                                                                                                            | Predicted host by HostPhinder                                                                                   | Reliability score linked to host prediction |          |
| PYO2014_2                                                                                                                | 1                              | 76,529                      | Escherichia phage ECBP2 (NC_018859.1)               | 77,315                    | 77.91                                                          | PYO97_20                                         | 4.2                                                                                                                             |                                                                                                                    | <a href="#">BLAST ATLAS of contig with Escherichia phage ECBP2 as reference</a>                                  |                                                                                                                            | Escherichia coli                                                                                                | 2.50E-01                                    |          |
| PYO2014_4                                                                                                                | 1                              | 282,352                     | Pseudomonas phage phiKZ (NC_004629.1)               | 280,334                   | 94.53                                                          | PYO97_33                                         | 0.68                                                                                                                            |                                                                                                                    | <a href="#">BLAST ATLAS of bin with Pseudomonas phage phiKZ as reference</a>                                     |                                                                                                                            | Pseudomonas aeruginosa                                                                                          | 7.80E-01                                    |          |
| PYO2014_8                                                                                                                | 1                              | 36,807                      | Enterococcus phage EFAP-1 (NC_012419.1)             | 21,115                    | 74.45                                                          | PYO97_12                                         | 33.36                                                                                                                           | Significantly larger than reference genome. Partial genome similar to PYO97_12                                     | <a href="#">BLAST Atlas of PYO2014_8 against Enterococcus phage EFAP-1</a>                                       | <a href="#">BLAST of PYO97_12 as reference and PYO2014_1 and PYO2014_8 as outer rings</a>                                  | <a href="#">BLAST Atlas of PYO2014_8 as reference and PYO97_12 and Enterococcus phage EFAP-1 as outer rings</a> | Enterococcus faecalis                       | 3.70E-01 |
| PYO2014_17                                                                                                               | 1                              | 88,099                      | Pseudomonas phage CHA P1 (NC_022974.1)              | 88,255                    | 94.91                                                          | PYO97_28                                         | 0.35                                                                                                                            |                                                                                                                    | <a href="#">BLAST ATLAS of contig with Pseudomonas phage CHA P1 as reference</a>                                 |                                                                                                                            | Pseudomonas aeruginosa                                                                                          | 6.90E-01                                    |          |
| PYO2014_18                                                                                                               | 1                              | 147,760                     | Enterobacteria phage phi92 (NC_023693.1)            | 148,612                   | 91.5                                                           | PYO97_17.30                                      | 5.92                                                                                                                            |                                                                                                                    | <a href="#">BLAST ATLAS of PYO2014_18 and PYO97_30 against Enterobacteria phage phi92 as reference</a>           | <a href="#">BLAST Atlas of PYO2014_18 Enterobacteria phage phi92 as reference</a>                                          | Escherichia coli                                                                                                | 7.30E-01                                    |          |
| PYO2014_23                                                                                                               | 1                              | 38,847                      | Enterobacteria phage K1F (NC_007456.1)              | 39,704                    | 82.27                                                          | PYO97_8                                          | 25.52                                                                                                                           |                                                                                                                    | <a href="#">BLAST ATLAS of contig against reference.</a>                                                         |                                                                                                                            | Escherichia coli                                                                                                | 4.20E-01                                    |          |

|                                                                                                                      |                                |                             |                                                     |                           |                                                                |                                                   |                                                                                                                                 |                                                           |                                                                                                                                          |                                                                                                |                                                                                                                                                                                       |                               |                                             |
|----------------------------------------------------------------------------------------------------------------------|--------------------------------|-----------------------------|-----------------------------------------------------|---------------------------|----------------------------------------------------------------|---------------------------------------------------|---------------------------------------------------------------------------------------------------------------------------------|-----------------------------------------------------------|------------------------------------------------------------------------------------------------------------------------------------------|------------------------------------------------------------------------------------------------|---------------------------------------------------------------------------------------------------------------------------------------------------------------------------------------|-------------------------------|---------------------------------------------|
| PYO2014_26.13                                                                                                        | 2                              | 65,818                      | Pseudomonas phage PEV2 (NC_031063.1)                | 72,697                    | 90.705                                                         | PYO97_11                                          | 69.978                                                                                                                          | Partial genome with corresponding bin in PYO97            | <a href="#">BLASTAtlas PYO2014_26.13 with Pseudomonas phage PEV2 as reference</a>                                                        | <a href="#">PYO2014_26 and PYO2014_13 against Pseudomonas phage PEV2</a>                       | <a href="#">BLASTAtlas PYO97_11 and PYO2014_26.13 with Pseudomonas phage PEV2 as reference</a>                                                                                        | Pseudomonas aeruginosa        | 8.60E-01                                    |
| PYO2014_27_16.5                                                                                                      | 2                              | 139,828                     | Enterococcus phage EFLK1 (NC_029026.1)              | 130,952                   | 90.812                                                         | PYO97_4                                           | 35.735                                                                                                                          |                                                           | <a href="#">BLAST ATLAS of contigs PYO2014_27_16 and PYO2014_27_5 against Enterococcus phage EFLK1</a>                                   | <a href="#">Contigs of the original bin with Enterococcus phage EFLK1 as reference</a>         |                                                                                                                                                                                       | Enterococcus faecalis         | 7.20E-01                                    |
| PYO2014 - Partial draft genome with low/medium resemblance to reference phage and counterpart in PYO97. (Category 3) |                                |                             |                                                     |                           |                                                                |                                                   |                                                                                                                                 |                                                           |                                                                                                                                          |                                                                                                |                                                                                                                                                                                       |                               |                                             |
| Phage draft genome                                                                                                   | No. of contigs in draft genome | Total no. of basepairs (bp) | Closest match among 3889 reference phages from NCBI | Reference phage size (bp) | ANI (%) between phage draft genome and closest reference phage | Closest match among phage draft genomes in PYO97  | ANI (%) between phage draft genome in PYO2014 (used as db) and closest match among phage draft genomes in PYO97 (used as query) | Comment                                                   | Additional analysis                                                                                                                      |                                                                                                |                                                                                                                                                                                       | Predicted host by HostPhinder | Reliability score linked to host prediction |
| PYO2014_28                                                                                                           | 1                              | 33,115                      | Yersinia phage phi80-18 (NC_019911.1)               | 42,081                    | 16.79                                                          | PYO97_27.21                                       | 77.7455                                                                                                                         |                                                           | <a href="#">BLAST ATLAS of PYO2014_28 with Yersinia phage phi80-18 as reference</a>                                                      | <a href="#">Blast Atlas of PYO97_27_21 and PYO2014_28 towards Yersinia phage phi80-18</a>      | <a href="#">Blast Atlas of PYO97_27.21 with PYO2014_28 as reference</a>                                                                                                               | Yersinia enterocolitica       | 1.50E-03                                    |
| PYO2014 - Partial draft genome with no resemblance to reference phage and no counterpart in PYO97. (Category 4)      |                                |                             |                                                     |                           |                                                                |                                                   |                                                                                                                                 |                                                           |                                                                                                                                          |                                                                                                |                                                                                                                                                                                       |                               |                                             |
| Phage draft genome                                                                                                   | No. of contigs in draft genome | Total no. of basepairs (bp) | Closest match among 3889 reference phages from NCBI | Reference phage size (bp) | ANI (%) between phage draft genome and closest reference phage | Closest match among phage draft genomes in PYO97  | ANI (%) between phage draft genome in PYO2014 (used as db) and closest match among phage draft genomes in PYO97 (used as query) | Comment                                                   | Additional analysis                                                                                                                      |                                                                                                |                                                                                                                                                                                       | Predicted host by HostPhinder | Reliability score linked to host prediction |
| PYO2014_7                                                                                                            | 1                              | 103,078                     | Escherichia phage bV EcoS AKFV33 (HQ665011.1)       | 108,853                   | 14.32                                                          | PYO97_22.3.14                                     | 12.8684                                                                                                                         |                                                           | <a href="#">BLAST Atlas of bin against ref</a>                                                                                           |                                                                                                |                                                                                                                                                                                       | Escherichia coli              | 2.60E-03                                    |
| PYO2014_9                                                                                                            | 1                              | 37,468                      | Enterococcus phage vB IME197 (NC_028671.1)          | 41,307                    | 15.18                                                          | PYO97_12                                          | 0.57                                                                                                                            |                                                           | <a href="#">BLAST ATLAS of contigs against reference</a>                                                                                 |                                                                                                |                                                                                                                                                                                       | Enterococcus faecalis         | 3.20E-03                                    |
| PYO2014_19                                                                                                           | 1                              | 43,272                      | Pseudomonas phage vB PaeP Tr60 Ab31 (NC_023575.1)   | 45,550                    | 45.35                                                          | PYO97_5                                           | 0.33                                                                                                                            |                                                           | <a href="#">BLAST ATLAS of contig against reference</a>                                                                                  |                                                                                                |                                                                                                                                                                                       | Pseudomonas aeruginosa        | 6.10E-02                                    |
| PYO2014_10                                                                                                           | 1                              | 10,736                      | Escherichia phage PBECO 4 (NC_027364.1)             | 348,113                   | 3.06                                                           | PYO97_10_85.139.47.48.59.38.5.35.15.78.55.4.14    | 3.05757                                                                                                                         |                                                           | <a href="#">BLAST ATLAS of contig with Escherichia phage PBECO 4 as reference</a>                                                        |                                                                                                |                                                                                                                                                                                       | Escherichia coli              | 1.10E-02                                    |
| PYO2014_11                                                                                                           | 1                              | 13,190                      | Escherichia phage PE3-1 (NC_024379.1)               | 39,093                    | 29.52                                                          | PYO97_8                                           | 9.23                                                                                                                            | Might belong to same family as 2014_23, 97_8, and 2014_25 | <a href="#">BLAST ATLAS of contig with Escherichia hage PE3-1 as reference</a>                                                           |                                                                                                |                                                                                                                                                                                       | Escherichia coli              | 1.20E-01                                    |
| PYO2014_14                                                                                                           | 1                              | 17,615                      | Escherichia phage PBECO 4 (NC_027364.1)             | 348,113                   | 4.35                                                           | PYO97_33                                          | 3.08                                                                                                                            |                                                           | <a href="#">BLAST ATLAS of contig with Escherichia phage PBECO 4 as reference</a>                                                        |                                                                                                |                                                                                                                                                                                       | Escherichia coli              | 2.10E-02                                    |
| PYO2014_20                                                                                                           | 4                              | 16,677                      | Enterococcus phage VD13 (NC_024212.1)               | 55,726                    | 20.55                                                          | PYO97_23                                          | 24.99                                                                                                                           |                                                           | <a href="#">BLAST Atlas of bin towards Enterococcus phage VD13</a>                                                                       | <a href="#">BLASTAtlas of PYO014_20 and PYO97_23 with Enterococcus phage VD13 as reference</a> |                                                                                                                                                                                       | Enterococcus faecalis         | 9.80E-02                                    |
| PYO2014_31                                                                                                           | 50                             | 227,129                     | Escherichia phage PBECO 4 (NC_027364.1)             | 348,113                   | 54.417                                                         | PYO97_10_85.139.47.48.59.38.5.35.15.78.55.4.14.1a | 55.4234                                                                                                                         |                                                           | <a href="#">BLASTAtlas of PYO97_10_85.139.47.48.59.38.5.35.15.78.55.44.14 and PYO2014_31 with Escherichia phage PBECO 4 as reference</a> | <a href="#">BLAST ATLAS of bin with Escherichia phage 121Q as reference</a>                    | Best reference is Escherichia phage 121Q (NC_025447.1), which has 54.72% ANI. Escherichia pahge PBECO 4 is the best common reference between PYO2014_31 and its counterpart in PYO97. | Escherichia coli              | 2.00E-01                                    |
| PYO2014 - Collapsed bins. (Category 5)                                                                               |                                |                             |                                                     |                           |                                                                |                                                   |                                                                                                                                 |                                                           |                                                                                                                                          |                                                                                                |                                                                                                                                                                                       |                               |                                             |

| Phage draft genome                                                             | No. of contigs in draft genome | Total no. of basepairs (bp) | Closest match among 3889 reference phages from NCBI                           | Reference phage size (bp) | ANI (%) between phage draft genome and closest reference phage | Closest match among phage draft genomes in PYO2014 | ANI (%) between phage draft genome in PYO97 (used as db) and closest match among phage draft genomes in PYO2014 (used as query) | Comment                                                                                                                                                                                             | Additional analysis                                                                             |                                                                                          |                                                                        | Predicted host by HostPhinder | Reliability score linked to host prediction |
|--------------------------------------------------------------------------------|--------------------------------|-----------------------------|-------------------------------------------------------------------------------|---------------------------|----------------------------------------------------------------|----------------------------------------------------|---------------------------------------------------------------------------------------------------------------------------------|-----------------------------------------------------------------------------------------------------------------------------------------------------------------------------------------------------|-------------------------------------------------------------------------------------------------|------------------------------------------------------------------------------------------|------------------------------------------------------------------------|-------------------------------|---------------------------------------------|
| PYO2014_3.16.29                                                                | 3                              | 54,712                      | Proteus phage pPM_01 (NC_028812.1)                                            | 58,546                    | 64.733                                                         | PYO97_25                                           | 98.203                                                                                                                          | kmer-coverage 557.677 (121.679) Overlapping contigs, i.e. PYO2014_3 and PYO2014_16 have k-mer coverage 449.796 495.515 respectively while the unique contig, PYO2014_29, has k-mer coverage=727.721 | <a href="#">BLAST ATLAS of PYO2014_3, 2014_29, and 2014_16 as outer rings against reference</a> |                                                                                          |                                                                        | Proteus mirabilis             | 5.80E-01                                    |
| PYO2014_5                                                                      | 25                             | 193,706                     | Enterobacteria phage GEC-35 (NC_025425.1)                                     | 163,424                   | 90.11                                                          | PYO97_29                                           | 13.8                                                                                                                            |                                                                                                                                                                                                     | <a href="#">BLAST ATLAS of contigs against reference</a>                                        | <a href="#">BLAST Atlas of sorted contigs</a>                                            |                                                                        | Escherichia coli              | 7.80E-01                                    |
| PYO2014_21                                                                     | 22                             | 180,343                     | Shigella phage SHFML-11 (NC_030953.1)                                         | 170,650                   | 88.2                                                           | PYO97_29                                           | 84.5                                                                                                                            | PYO97_29 has Enterobacteria phage RB14 (NC_012638.1) as reference, which has 84.406% ANI towards PYO2014_21. The common reference with the highest ANI is Shigella phage SHFML-11.                  | <a href="#">BLAST Atlas of PYO2014_21 against Shigella phage SHFML-11</a>                       | <a href="#">BLAST Atlas PYO2014_21 and PYO97_29 with Shigella as reference</a>           | <a href="#">BLAST Atlas of contigs against Shigella phage SHFML-11</a> | Shigella sonnei               | 8.40E-01                                    |
| PYO2014_25                                                                     | 3                              | 78,290                      | Enterobacteria phage 285P (NC_015249.1)                                       | 39,270                    | 76.539                                                         | PYO97_8                                            | 76.16                                                                                                                           |                                                                                                                                                                                                     | <a href="#">PYO2014_25 contigs against reference</a>                                            | <a href="#">PYO97_8 and PYO2014_25 against reference</a>                                 |                                                                        | Escherichia coli              | 4.10E-01                                    |
| PYO2014 - Special cases, including bins classified as non-phages. (Category 6) |                                |                             |                                                                               |                           |                                                                |                                                    |                                                                                                                                 |                                                                                                                                                                                                     |                                                                                                 |                                                                                          |                                                                        |                               |                                             |
| Phage draft genome                                                             | No. of contigs in draft genome | Total no. of basepairs (bp) | Closest match among 3889 reference phages from NCBI                           | Reference phage size (bp) | ANI (%) between phage draft genome and closest reference phage | Closest match among phage draft genomes in PYO2014 | ANI (%) between phage draft genome in PYO97 (used as db) and closest match among phage draft genomes in PYO2014 (used as query) | Comment                                                                                                                                                                                             | Additional analysis                                                                             |                                                                                          |                                                                        | Predicted host by HostPhinder | Reliability score linked to host prediction |
| PYO2014_6                                                                      | 26                             | 75,778                      | Uncultured phage WW-nAnB strain 2 (NC_026612.1)                               | 5,077                     | 1.91                                                           | PYO97_6                                            | 10.51                                                                                                                           | Ref. phage is partial Longest contig 5513 and shorter 2013                                                                                                                                          | Test with MetaPhinder if it is a phage                                                          | The bin has 1.862% ANI towards phages in public databases. Possibly it is not a phage.   |                                                                        | Clostridium perfringens       | 3.10E-03                                    |
| PYO2014_15                                                                     | 1                              | 20,152                      | uncultured Mediterranean phage uvMED-CGF-C24-MedDCM-OCT-S28-C185 (AP013656.1) | 5,986                     | 0.69                                                           | PYO97_21                                           | 0.2                                                                                                                             |                                                                                                                                                                                                     | Test with MetaPhinder if it is a phage                                                          | The bin has 5.226% ANI towards phages in public databases. Possibly it is not a phage.   |                                                                        | Pseudomonas syringae          | 2.50E-04                                    |
| PYO2014_22                                                                     | 5                              | 57,117                      | Pseudomonas phage O4 (NC_031274.1)                                            | 50,509                    | 1.78                                                           | PYO97_33                                           | 0.28                                                                                                                            |                                                                                                                                                                                                     | <a href="#">BLAST ATLAS of contigs with Pseudomonas phage O4 as reference</a>                   | The bin has 8.52427% ANI towards phages in public databases. Possibly it is not a phage. |                                                                        | Vibrio parahaemolyticus       | 3.10E-04                                    |
| PYO2014_24                                                                     | 26                             | 89,259                      | Cronobacter phage vB_CsaM_GAP161 (NC_019398.1)                                | 178,193                   | 42.11                                                          | PYO97_7                                            | 3.79                                                                                                                            | Shorter contig 2014 and longest 6898                                                                                                                                                                | <a href="#">BLAST ATLAS of contigs with Cronobacter phage vB_CsaM_GAP161 as reference</a>       | 79.4769% ANI towards phages in public databases. Short contigs.                          |                                                                        | Cronobacter sakazakii         | 1.90E-01                                    |
